# Supplementary material
Source: PubMed Central journal article supplement (PMC6728692)
Supplement: DS_10.1177_0022034515616760.pdf [file DS_10.1177_0022034515616760.pdf]

# Topography Influences Adherent Cell Regulation of Osteoclastogenesis

Journal of Dental Research  
DSI  
© International & American Associations  
for Dental Research 2015  
Reprints and permissions:  
sagepub.com/journalsPermissions.nav  
DOI: 10.1177/0022034515616760  
jdr.sagepub.com

M. Nagasawa<sup>1,2</sup>, L.F. Cooper<sup>1</sup>, Y. Ogino<sup>3</sup>, D. Mendonca<sup>4</sup>, R. Liang<sup>1</sup>,  
S. Yang<sup>5</sup>, G. Mendonca<sup>4</sup>, and K. Uoshima<sup>2</sup>

## Appendix

### Preparation of Titanium Disks

Commercially available pure-grade IV titanium disks (20.0 × 1.0 mm) were prepared and the surfaces modified as 3 kinds of topography. Briefly, 1 group of disks was polished with sand paper of 600 grits, sonicated 3 times in water for 15 min each to clean, and soaked in 30% HNO<sub>3</sub> for 5 min. These disks served as the smooth surface group. The other 2 groups of disks were polished with sand papers from grade 320 to 400 and 600 grits, subsequently grit-blasted with 100-μm aluminum oxide particles, and sonicated 3 times in water for 15 min to clean. The second group of disks were treated with 5N HCl overnight and sonicated 3 times in water for 15 min and then passive 30% HNO<sub>3</sub> for 5 min. These disks served as the micron surface group. The third group of disks were immersed in 50% (v/v) solution of 30% H<sub>2</sub>O<sub>2</sub> and 2N H<sub>2</sub>SO<sub>4</sub> for 2 h (Nanci et al. 1998; de Oliveira and Nanci 2004; Vetrone et al. 2009). These disks are referred to as the nano surface group. Before cells were seeded on the disks, all disks were soaked in 70% ethanol for 24 h, then dried, and exposed to ultraviolet light in a steric tissue culture hood for 24 h.

### Animal Surgery

Sprague-Dawley rats (250–300 g; Harlan, Indianapolis, IN, USA) were anesthetized by an intraperitoneal injection of a mixture of ketamine (80 to 100 mg/kg) and xylazine (10 mg/kg), and supplemental local anesthesia was obtained with lidocaine 2% with epinephrine (1:100,000). A incision site of the tibia was shaved gently, and a 2-cm incision was made through the skin and periosteum, muscle, and neurovascular bundle, which was retracted to reveal the medial and dorsal aspect of the tibial bone. With sterilized stainless steel burs, osteotomies were created by 1.7-mm diameter holes through the cortex. Sterile

implants (1.8 × 2.0 mm; JMR Inc., Niigata, Japan) with smooth, micro, and nano surfaces were placed into the osteotomy, and the skin was closed. Ketoprofen (5 mg/kg) was provided subcutaneously following surgery. The animals were monitored continuously until they ambulated on their limbs and took fluids. After 1-d implantation, the tibiae were harvested to flush out bone marrow for bone marrow-derived macrophage culture.

### Appendix References

- de Oliveira PT, Nanci A. 2004. Nanotexturing of titanium-based surfaces upregulates expression of bone sialoprotein and osteopontin by cultured osteogenic cells. *Biomaterials*. 15(3):403–413.
- Nanci A, Wuest JD, Peru L, Brunet P, Sharma V, Zalzal S, McKee MD. 1998. Chemical modification of titanium surfaces for covalent attachment of biological molecules. *J Biomed Mater Res*. 40(2):324–335
- Vetrone F, Variola F, Tambasco de Oliveira P, Zalzal SF, Yi JH, Sam J, Bombonato-Prado KF, Sarkissian A, Perepichka DF, Wuest JD, et al. 2009. Nanoscale oxidative patterning of metallic surfaces to modulate cell activity and fate. *Nano Lett*. 9(2):659–665.

<sup>1</sup>Bone Biology and Implant Therapy Laboratory, School of Dentistry, University of North Carolina, Chapel Hill, NC, USA

<sup>2</sup>Division of Bio-prosthodontics, Niigata University Graduate School of Medical and Dental Sciences, Niigata, Japan

<sup>3</sup>Department of Oral Rehabilitation, Kyushu University, Fukuoka, Japan

<sup>4</sup>Department of Biologic and Materials Sciences, Division of Prosthodontics, School of Dentistry, University of Michigan, Ann Arbor, MI, USA

<sup>5</sup>College of Stomatology, Chongqing Medical University, Chongqing, China

A supplemental appendix to this article is published electronically only at <http://jdr.sagepub.com/supplemental>.

### Corresponding Author:

L.F. Cooper, Bone Biology and Implant Therapy Laboratory, School of Dentistry, University of North Carolina, 4610 Koury Oral Health Sciences Building CB #7450, Chapel Hill, NC 27599-7260, USA.  
Email: Lyndon\_Cooper@unc.edu
